# Supplementary material for: Elucidating the Molecular Responses to Waterlogging Stress in Cucumis melo by Comparative Transcriptome Profiling
Source: MDPI journal article supplement (doi:10.3390/horticulturae8100891), 2022-09-29
Supplement: s1 [file Supplementary figures.pdf › Supplementary figures.pdf]

## Supplementary materials

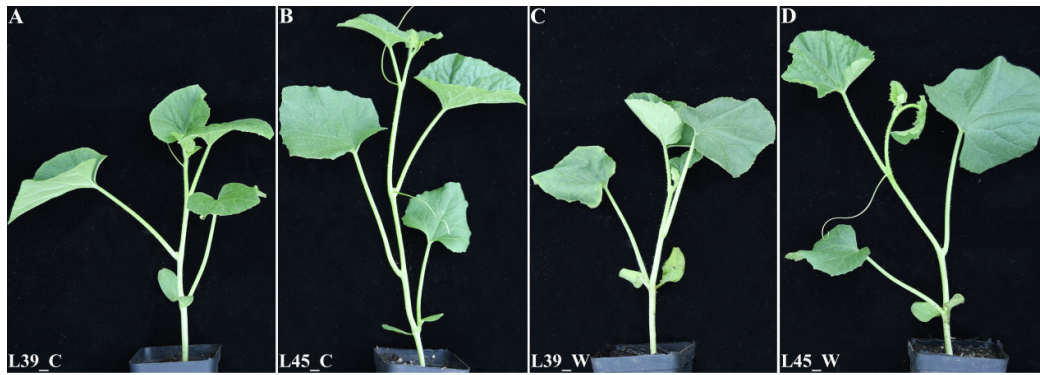

**Figure S1.** Plant growth of 'L39' and 'L45' in control (A, B) and waterlogged plants after four days of waterlogging stress (C, D).

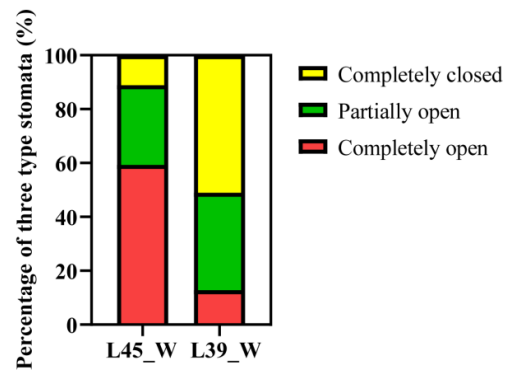

**Figure S2.** The percentage of three levels of stomatal opening in 'L39' and 'L45' leaves under waterlogging stress for four days (n = 47 stomata for 'L39'; n = 54 stomata for 'L45').
